# Supplementary material for: SiO2–H3BO3promoted solvent-free, green and sustainable synthesis of bioactive 1-substituted-1H-tetrazole analogues
Source: Royal Society of Chemistry journal article supplement (doi:10.1039/c4nj02079k), 2015-01-01
Supplement: c4nj02079k1.pdf [file c4nj02079k1.pdf]

### Supplementary information

#### **SiO<sub>2</sub>-H<sub>3</sub>BO<sub>3</sub> promoted solvent-free, green and sustainable synthesis of bioactive 1-substituted-1*H*-tetrazole analogues**

Mehtab Parveen,<sup>\*a</sup> Faheem Ahmad,<sup>a</sup> Ali Mohammed Malla,<sup>a</sup> Shaista Azaz<sup>a</sup>

<sup>a</sup>Division of Organic Synthesis, Aligarh Muslim University, Aligarh, 202002, India

*\*Corresponding author: Mehtab Parveen*

*E-mail: mehtab.organic2009@gmail.com; Tel: +91-9897179498*

# $^1\text{H}$ and $^{13}\text{C}$ NMR spectra of synthesized compounds

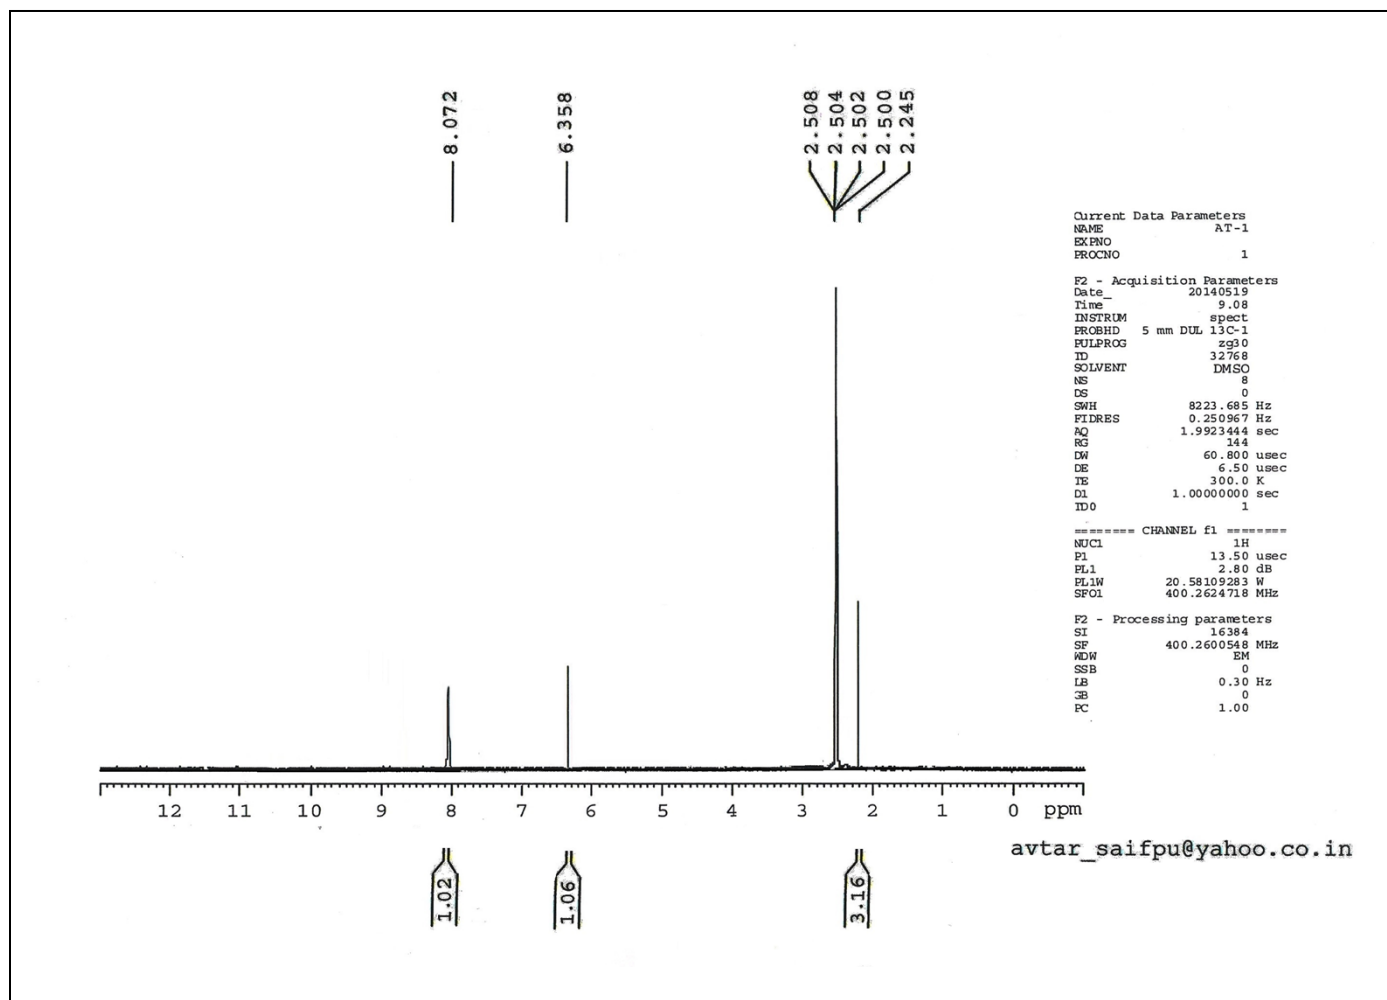

$^1\text{H}$  NMR of compound 4a

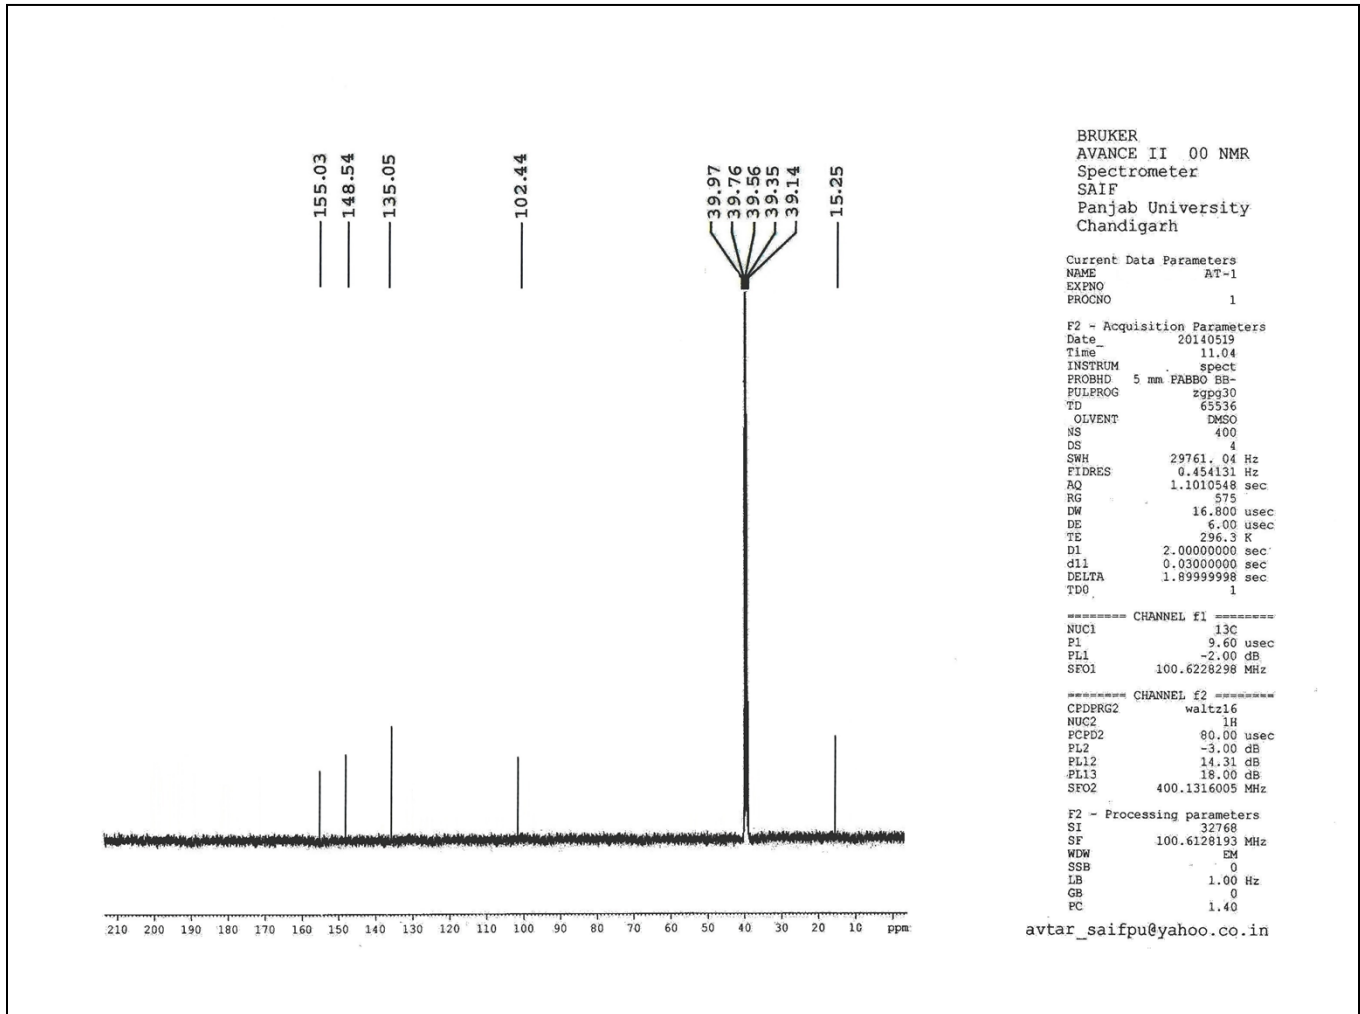

**<sup>13</sup>C NMR of compound 4a**

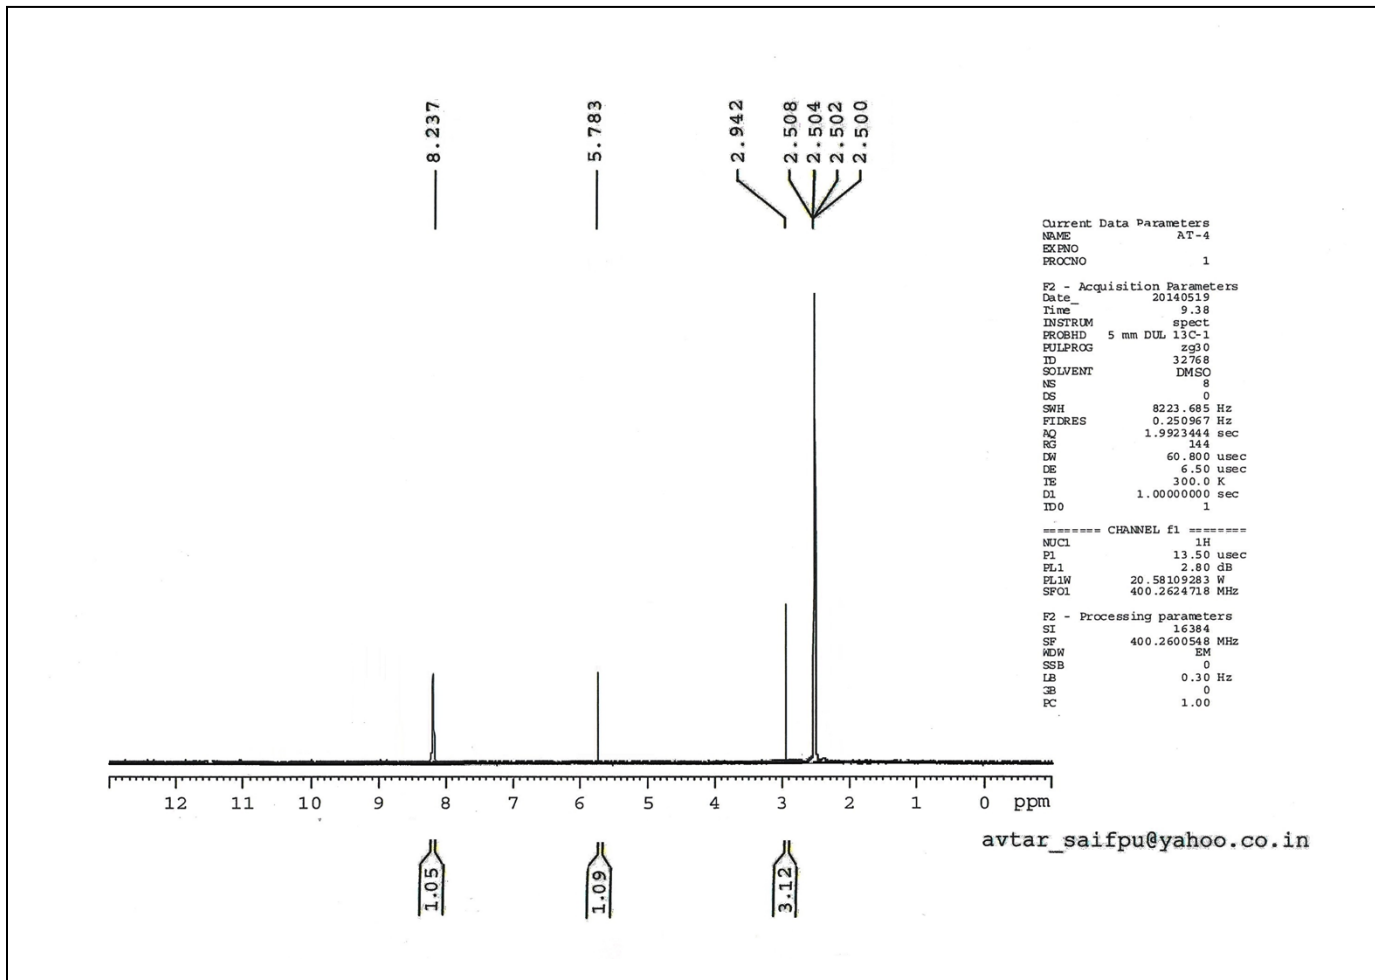

**<sup>1</sup>H NMR of compound 4d**

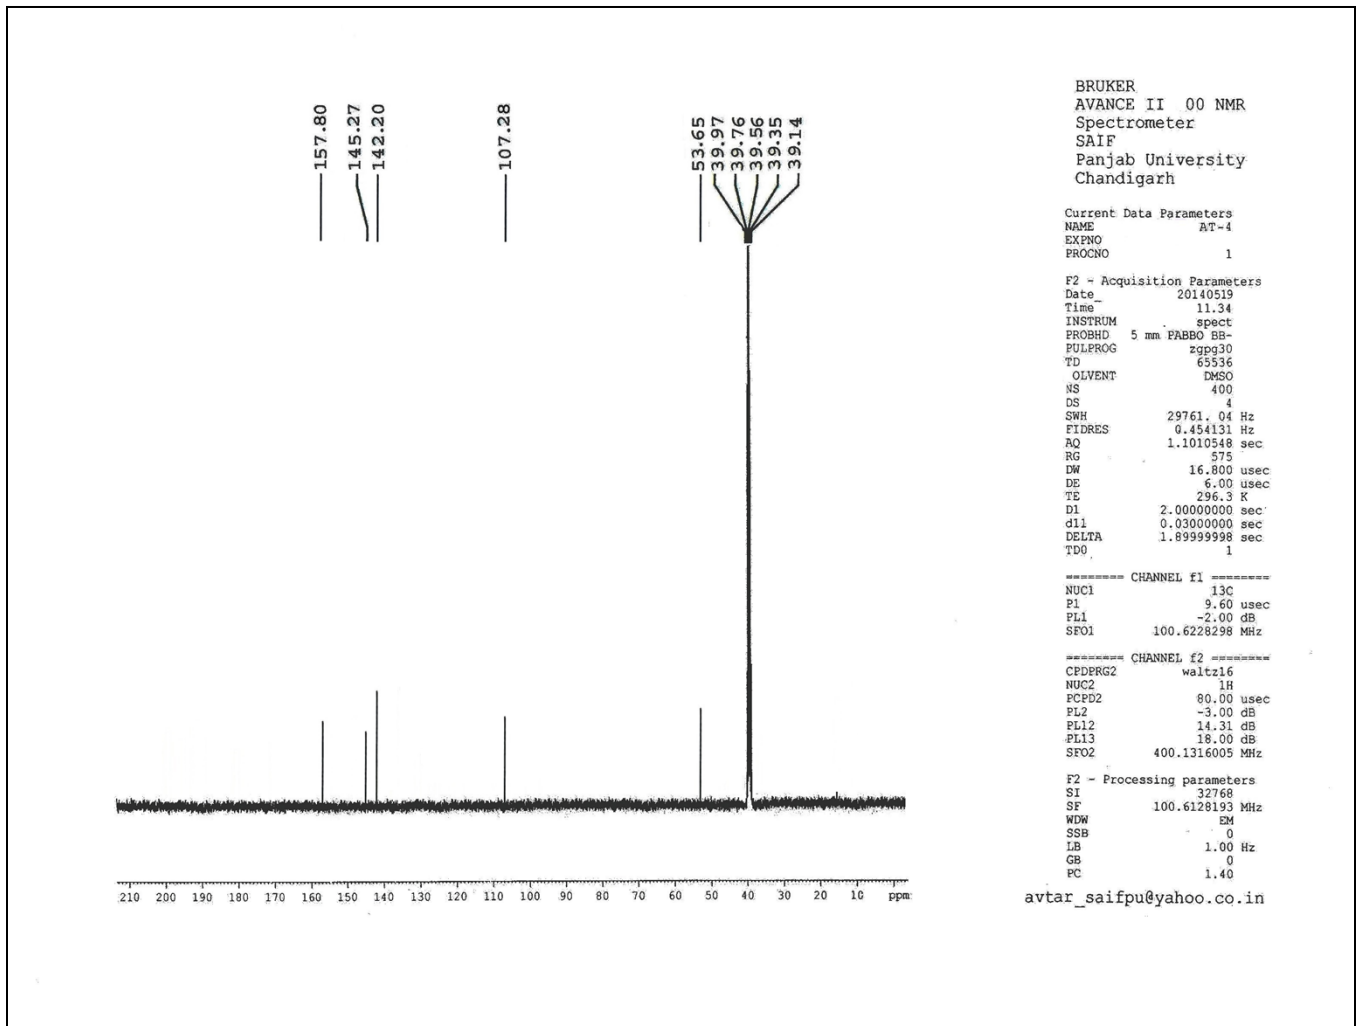

<sup>13</sup>C NMR of compound 4d

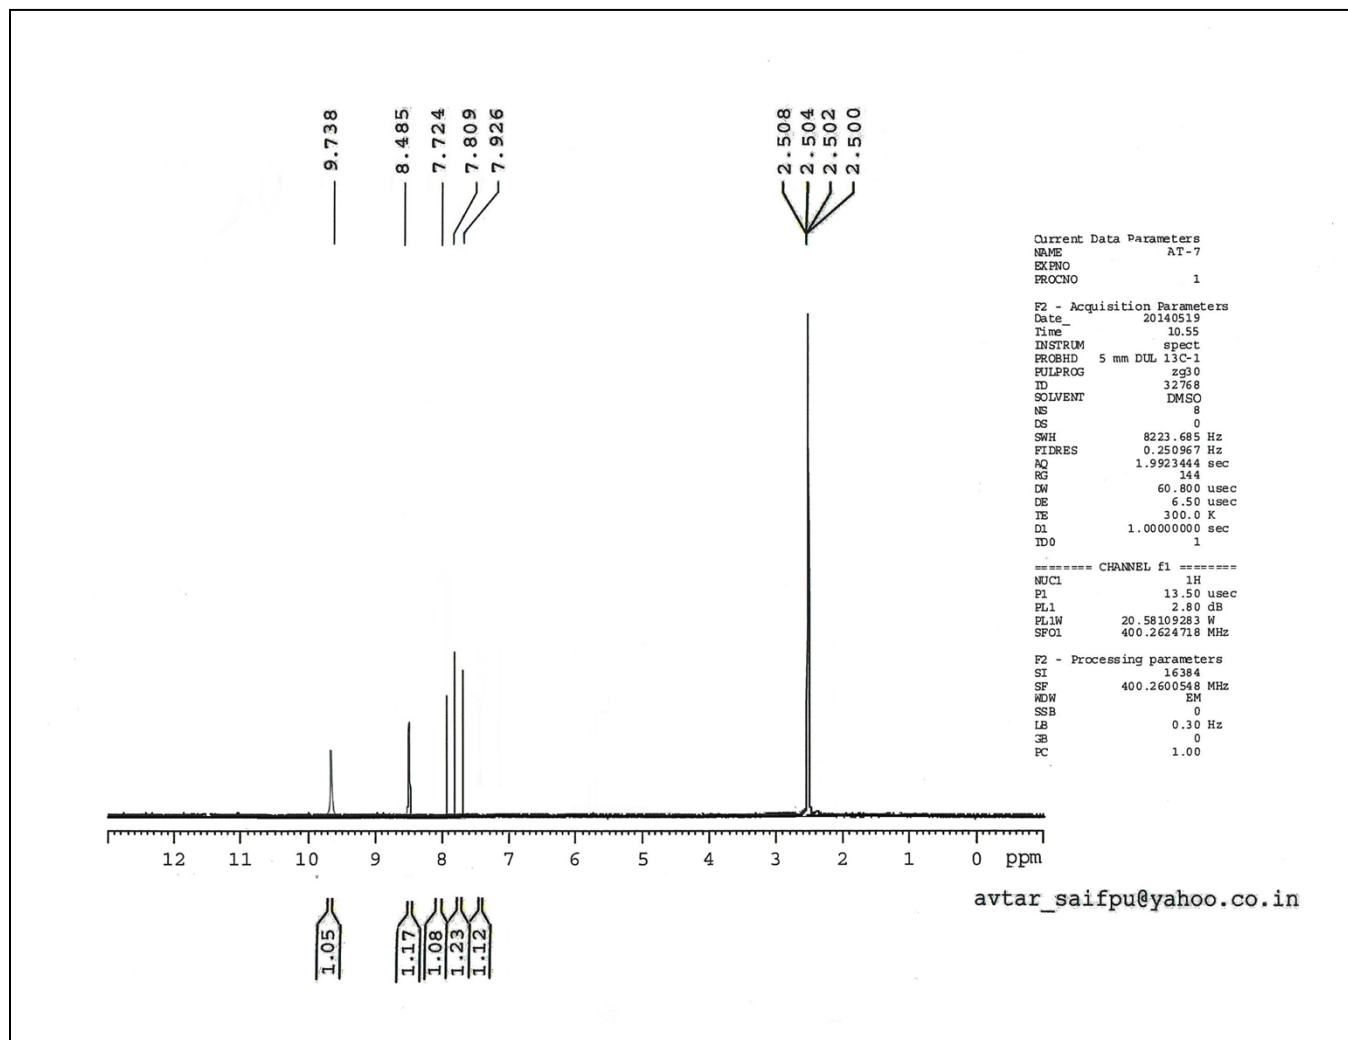

**<sup>1</sup>H NMR of compound 4g**

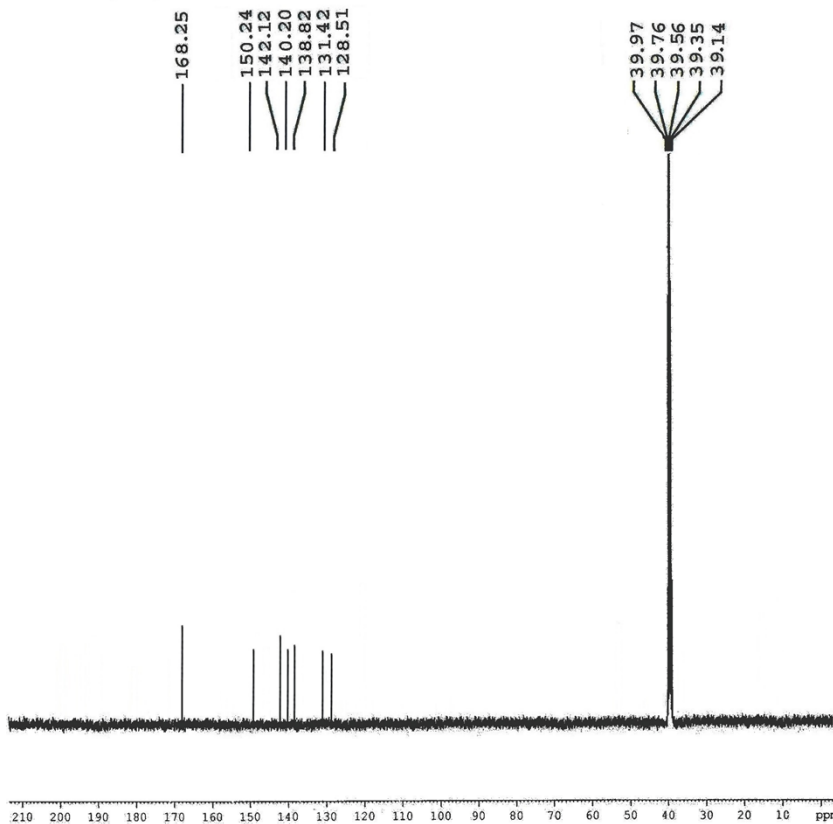

BRUKER  
 AVANCE II 00 NMR  
 Spectrometer  
 SAIF  
 Panjab University  
 Chandigarh

Current Data Parameters  
 NAME AT-7  
 EXPNO 1  
 PROCNO 1

F2 - Acquisition Parameters  
 Date 20140519  
 Time 11.53  
 INSTRUM spect  
 PROBHD 5 mm F4BBO BB-  
 PULPROG zgpg30  
 TD 65536  
 SOLVENT DMSO  
 NS 400  
 DS 4  
 SWH 29761.04 Hz  
 FIDRES 0.454131 Hz  
 AQ 1.1010548 sec  
 RG 575  
 DW 16.800 usec  
 DE 6.00 usec  
 TE 296.3 K  
 D1 2.0000000 sec  
 d11 0.0300000 sec  
 DELTA 1.89999998 sec  
 TDO 1

===== CHANNEL f1 =====  
 NUC1 13C  
 P1 9.60 usec  
 PL1 -2.00 dB  
 SFO1 100.6228298 MHz

===== CHANNEL f2 =====  
 CPDPRG2 waltz16  
 NUC2 1H  
 PCPD2 80.00 usec  
 PL2 -3.00 dB  
 PL12 14.31 dB  
 PL13 18.00 dB  
 SFO2 400.1316005 MHz

F2 - Processing parameters  
 SI 32768  
 SF 100.6128193 MHz  
 WDW EM  
 SSB 0  
 LB 1.00 Hz  
 GB 0  
 PC 1.40

avtar\_saifpu@yahoo.co.in

**<sup>13</sup>C NMR of compound 4g**

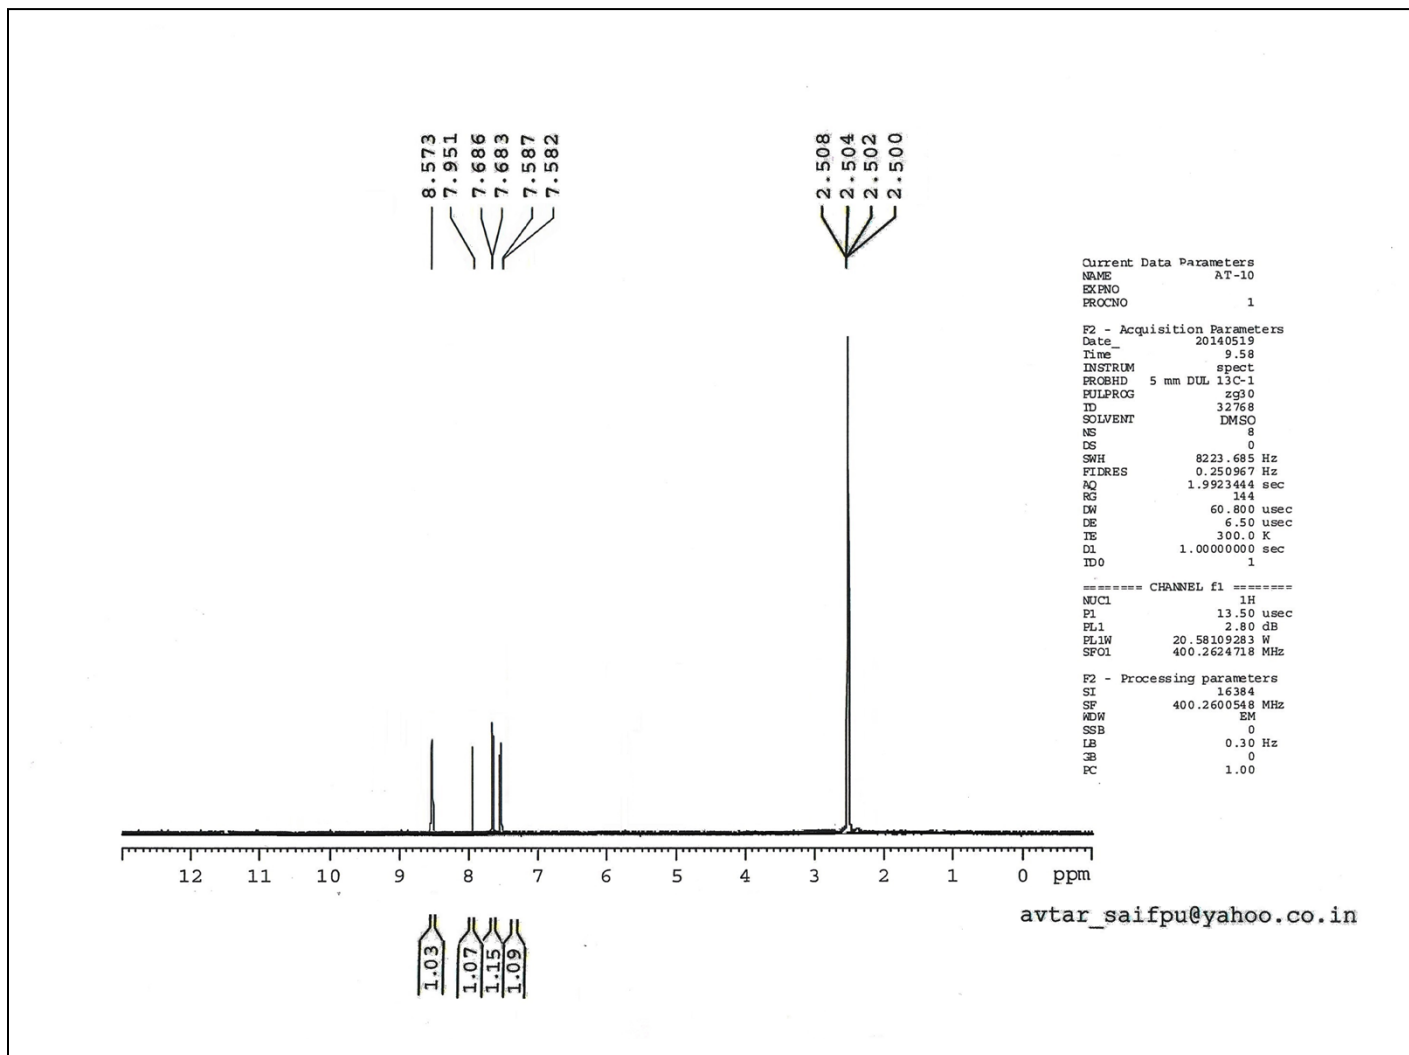

**<sup>1</sup>H NMR of compound 4j**



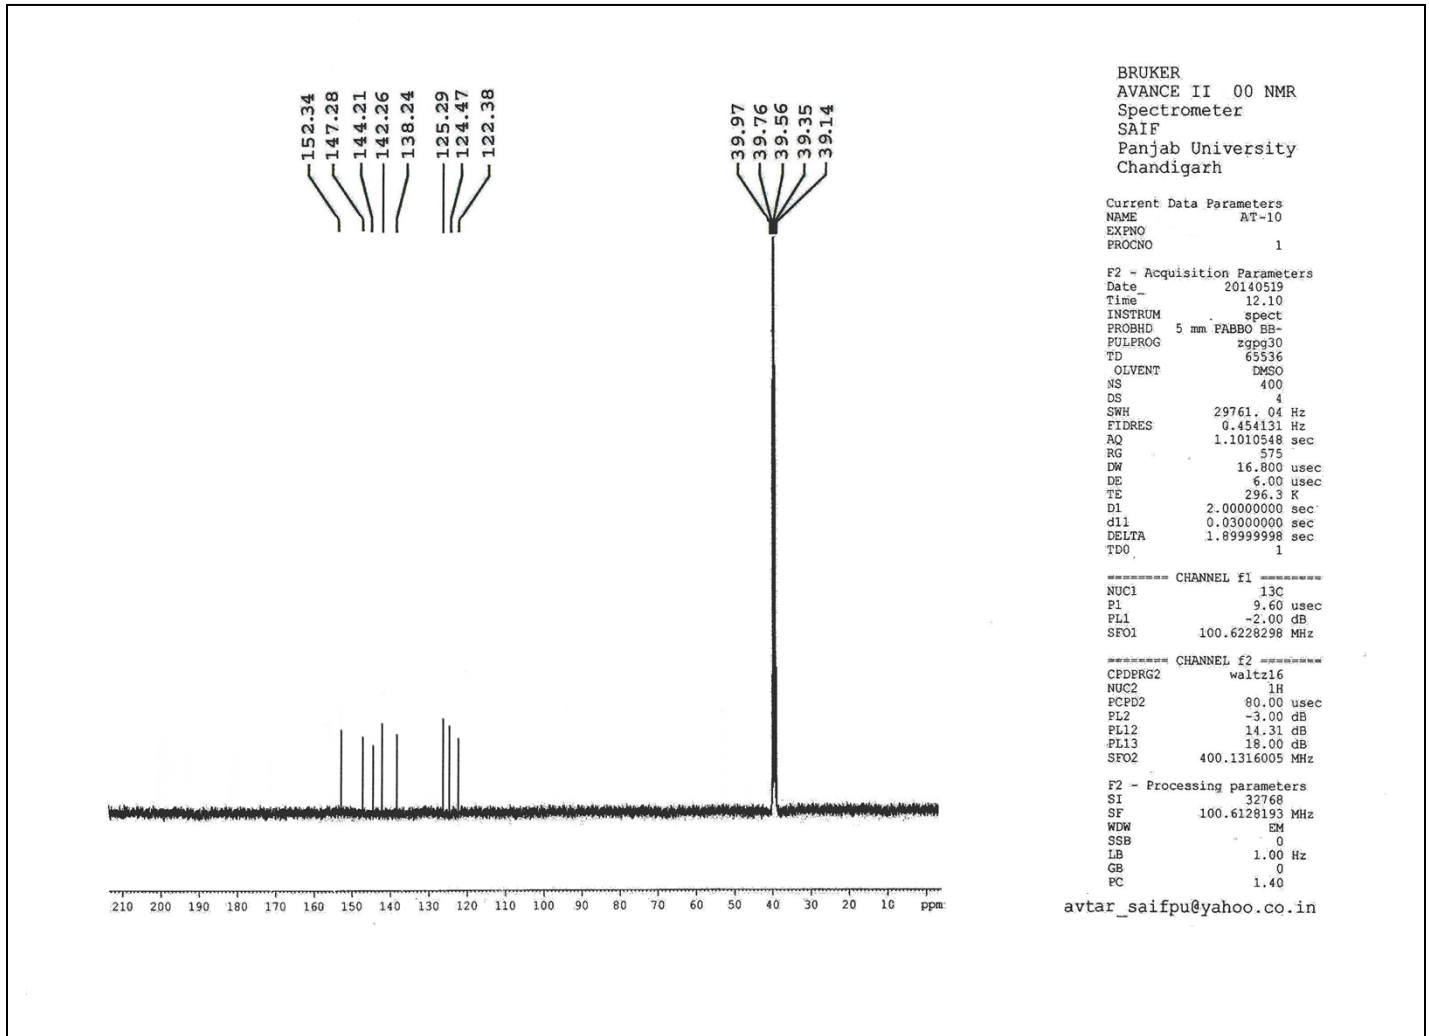

**<sup>13</sup>C NMR of compound 4j**

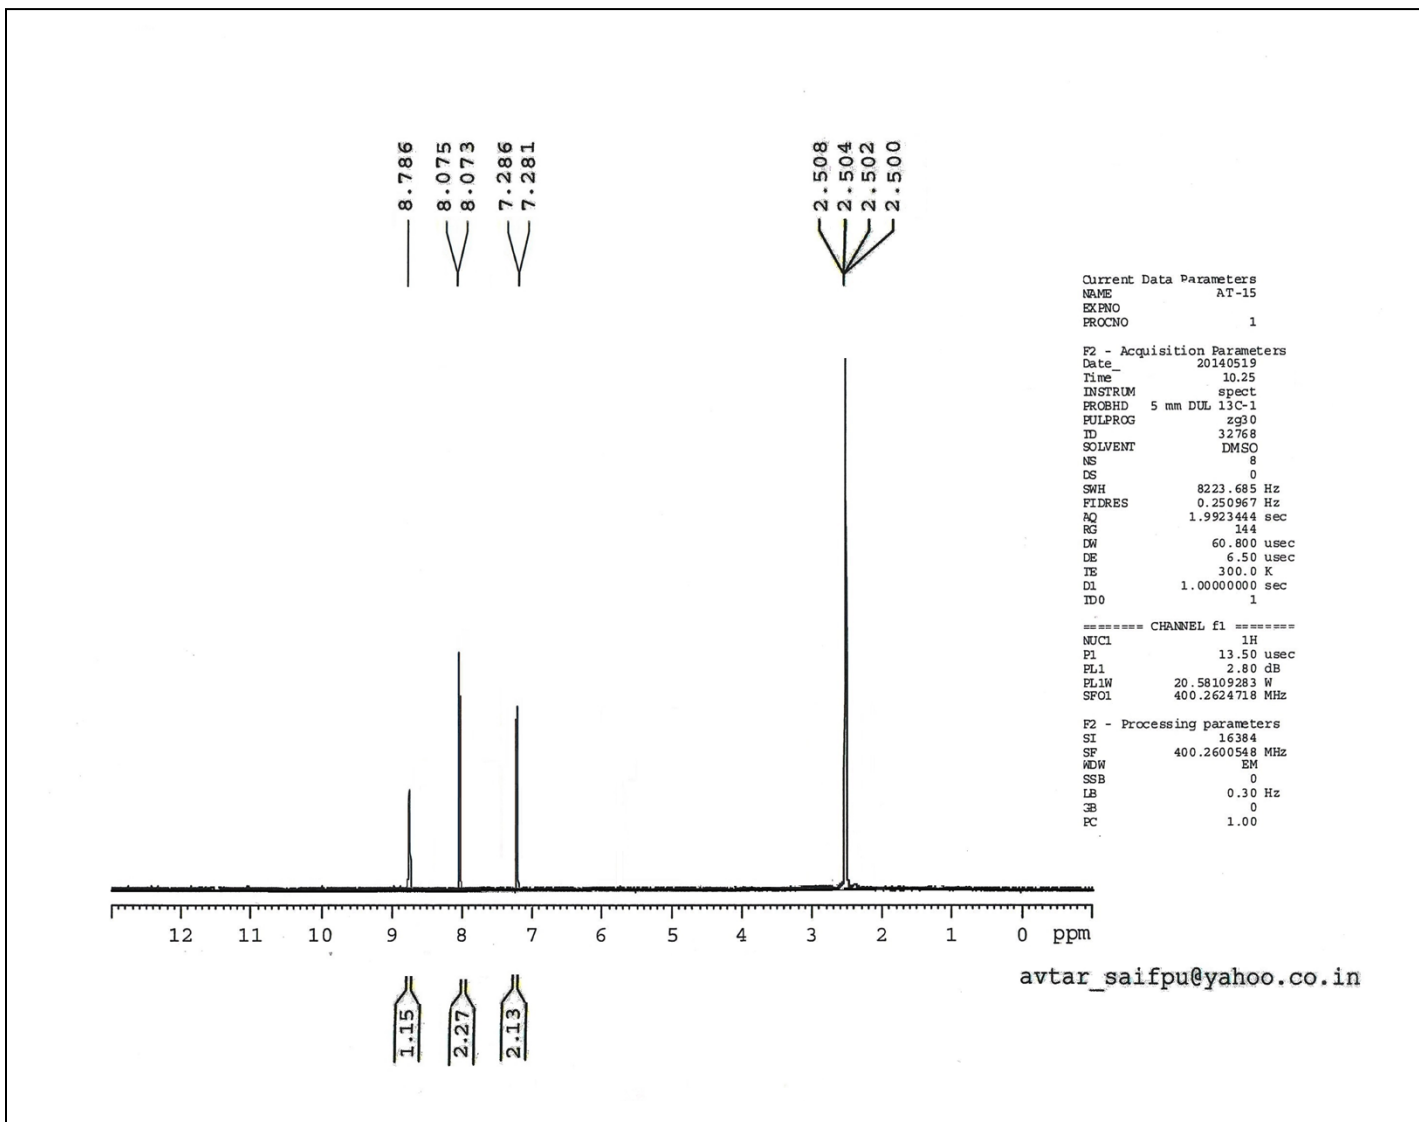

<sup>1</sup>H NMR of compound 4o

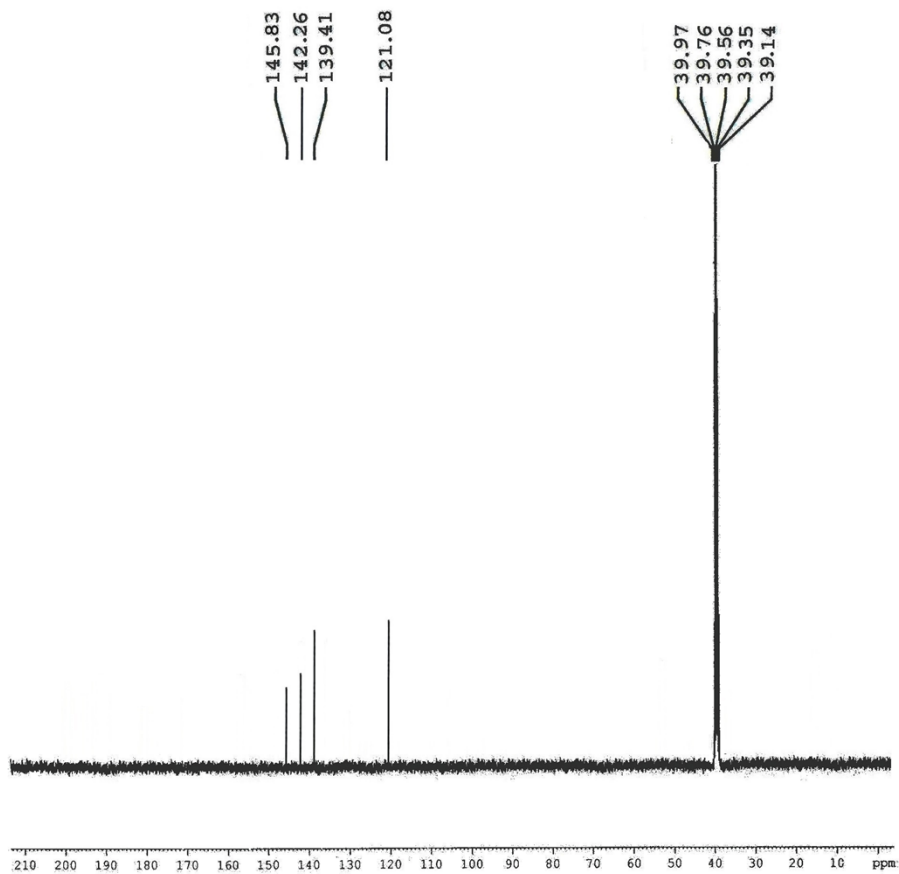

BRUKER  
AVANCE II 00 NMR  
Spectrometer  
SAIF  
Panjab University  
Chandigarh

Current Data Parameters  
NAME AT-15  
EXPNO 1  
PROCNO 1

F2 - Acquisition Parameters  
Date\_ 20140519  
Time 12.45  
INSTRUM spect  
PROBHD 5 mm FABBO BB-  
PULPROG zgpg30  
TD 65536  
SOLVENT DMSO  
NS 400  
DS 4  
SWH 29761.04 Hz  
FIDRES 0.454131 Hz  
AQ 1.1010548 sec  
RG 575  
DW 16.800 usec  
DE 6.00 usec  
TE 296.3 K  
D1 2.0000000 sec  
d11 0.0300000 sec  
DELTA 1.89999998 sec  
TDO 1

----- CHANNEL f1 -----  
NUC1 13C  
P1 9.60 usec  
PL1 -2.00 dB  
SFO1 100.6228298 MHz

----- CHANNEL f2 -----  
CPDPRG2 waltz16  
NUC2 1H  
PCPD2 80.00 usec  
PL2 -3.00 dB  
PL12 14.31 dB  
PL13 18.00 dB  
SFO2 400.1316005 MHz

F2 - Processing parameters  
SI 32768  
SF 100.6128193 MHz  
WDW EM  
SSB 0  
LB 1.00 Hz  
GB 0  
PC 1.40

avtar\_saifpu@yahoo.co.in

<sup>13</sup>C NMR of compound 40
